# Supplementary material for: Long noncoding RNA ANRIL indicates a poor prognosis of gastric cancer and promotes tumor growth by epigenetically silencing of miR-99a/miR-449a
Source: PubMed Central journal article supplement (PMC4039162; doi:10.18632/oncotarget.1902), 2014-04-16
Supplement: oncotarget-05-2276-s001.pdf [file oncotarget-05-2276-s001.pdf]

# Long noncoding RNA ANRIL indicates a poor prognosis of gastric cancer and promotes tumor growth by epigenetically silencing of miR-99a/miR-449a

Supplementary Material

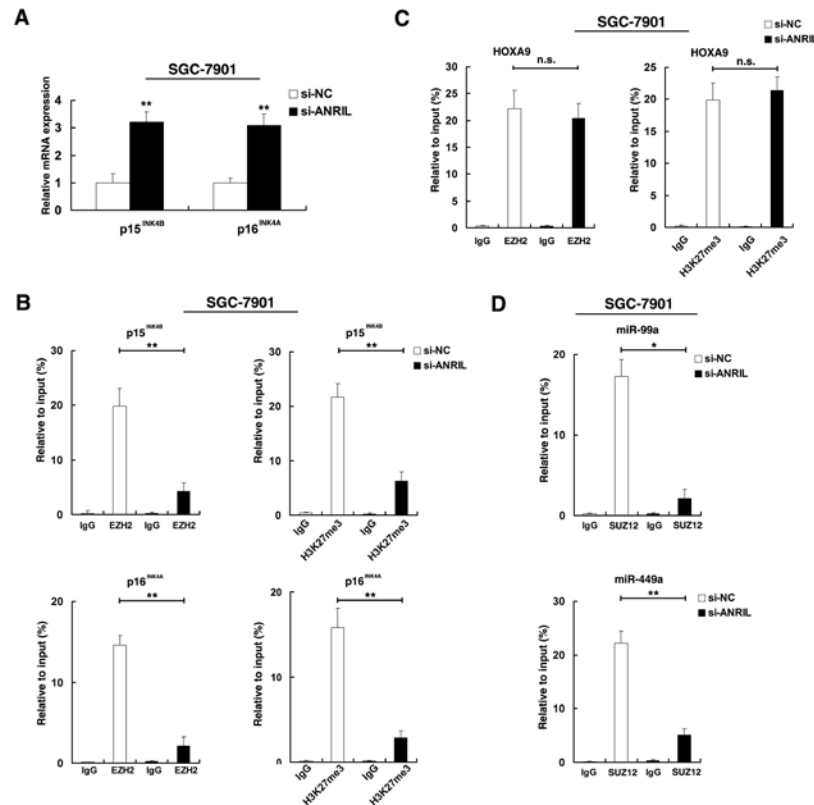

**Figure S1:** (A) qRT-PCR was performed to detect p15<sup>INK4B</sup> and p16<sup>INK4A</sup> expression after *ANRIL* knockdown. (B) ChIP-qPCR of H3K27me3 and EZH2 of the promoter region of p15<sup>INK4B</sup>/p16<sup>INK4A</sup> locus after siRNA treatment targeting si-NC or si-*ANRIL* in SGC-7901 cells, Antibody enrichment was quantified relative to the amount of input DNA. Antibody directed against IgG was used as a negative control. (C) ChIP-qPCR of H3K27me3 and EZH2 of the promoter region of HOXA9 after siRNA treatment targeting si-NC or si-*ANRIL* in SGC-7901 cells. Antibody enrichment was quantified relative to the amount of input DNA. (D) ChIP-qPCR of SUZ12 of the promoter region of miR-99a/miR-449a after siRNA treatment targeting si-NC or si-*ANRIL* in SGC-7901 cells, Antibody enrichment was quantified relative to the amount of input DNA.

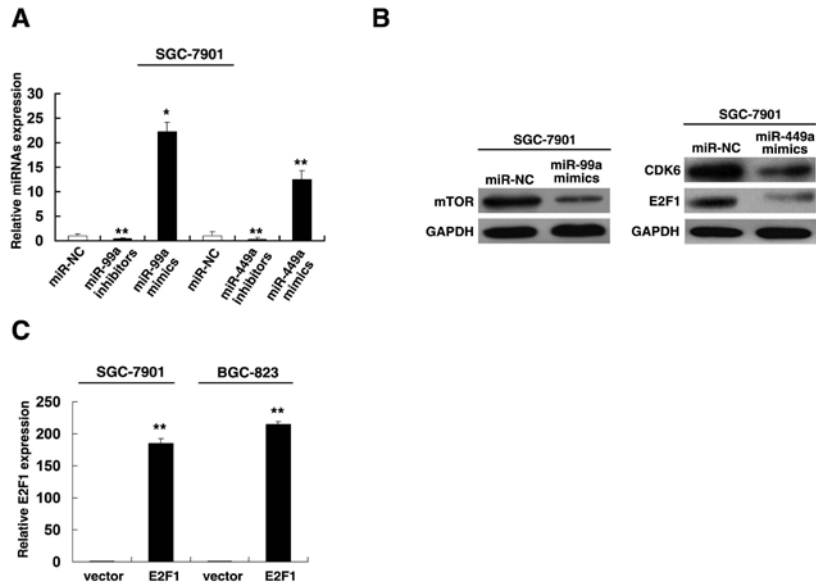

**Figure S2:** (A) qRT-PCR was performed to detect the expression after SGC-7901 cells transfected with miR-99a/miR-449a mimics/ inhibitors or miR-NC. (B) SGC-7901 cells were transfected with miR-99a/miR-449a mimics or miR-NC. Western blot assays of mTOR/CDK6/E2F1 after transfection. (C) qRT-PCR was used to detect E2F1 expression after SGC-7901/BGC-823 cells transfected with E2F1 expression plasmid or control vector.

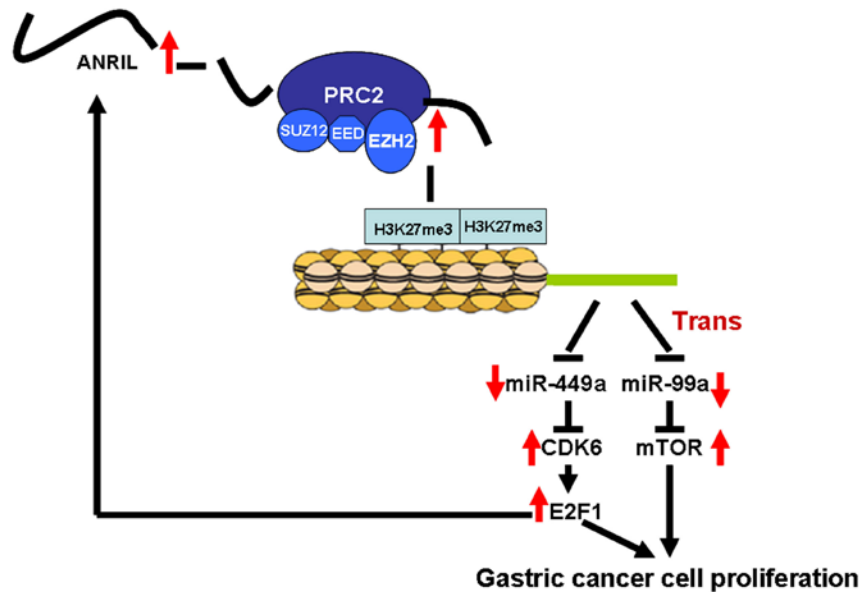

**Figure S3**: proposed model which mediated by ANRIL could form positive feedback loop in gastric cancer cell cycle progression and growth control.
